# Supplementary material for: Infection of Human Coronary Artery Endothelial Cells by Group B Streptococcus Contributes to Dysregulation of Apoptosis, Hemostasis, and Innate Immune Responses
Source: Hindawi journal article supplement (doi:10.1155/2011/971502), 2011-01-01
Supplement: f1 [file 971502.f1.pdf]

**Supplement**

| GO Category                                | Gene title                                                           | Regulation | Gen Bank accession no.                           | Affymetrix ID |
|--------------------------------------------|----------------------------------------------------------------------|------------|--------------------------------------------------|---------------|
| Cell cycle arrest                          | protein phosphatase 1, regulatory (inhibitor) subunit 15A            | 4,5 ▲      | NM_014330                                        | 37028_at      |
|                                            | DNA-damage-inducible transcript 3                                    | 4,3 ▲      | NM_004083                                        | 209383_at     |
|                                            | protein phosphatase 1, regulatory (inhibitor) subunit 15A            | 4,1 ▲      | NM_014330                                        | 202014_at     |
|                                            | interleukin 8                                                        | 3,5 ▼      | NM_000584                                        | 202859_x_at   |
|                                            | interleukin 8                                                        | 3,9 ▼      | NM_000584                                        | 211506_s_at   |
| Chemotaxis                                 | plasminogen activator, urokinase plasminogen activator, urokinase    | 3,4 ▲      | NM_002658                                        | 211668_s_at   |
|                                            | v-ral simian leukemia viral oncogene homolog A (ras related)         | 3,2 ▲      | NM_005402                                        | 224880_at     |
|                                            | plasminogen activator, urokinase                                     | 3,1 ▲      | NM_002658                                        | 205479_s_at   |
|                                            | interleukin 8                                                        | 3,5 ▼      | NM_000584                                        | 202859_x_at   |
|                                            | interleukin 8                                                        | 3,9 ▼      | NM_000584                                        | 211506_s_at   |
|                                            | chemokine (C-X-C motif) ligand 6 (granulocyte chemotactic protein 2) | 3,9 ▼      | NM_002993                                        | 206336_at     |
| Ligand-dependent nuclear receptor activity | nuclear receptor subfamily 4, group A, member 2                      | 5,2 ▲      | NM_006186<br>NM_173171<br>NM_173172<br>NM_173173 | 204621_s_at   |
|                                            | nuclear receptor subfamily 4, group A, member 2                      | 5,2 ▲      | NM_006186<br>NM_173171<br>NM_173172<br>NM_173173 | 216248_s_at   |
|                                            | nuclear receptor subfamily 4, group A, member 2                      | 4,3 ▲      | NM_006186                                        | 204622_x_at   |
|                                            | nuclear receptor subfamily 4, group A, member 1                      | 3,6 ▲      | NM_002135                                        | 202340_x_at   |
|                                            | Nuclear receptor subfamily 2, group F, member 1                      | 4,5 ▼      | NM_005654                                        | 209505_at     |

|                                  |                                                                                                                                                                    |        |                                                  |              |
|----------------------------------|--------------------------------------------------------------------------------------------------------------------------------------------------------------------|--------|--------------------------------------------------|--------------|
| Methylation                      | v-fos FBJ murine osteosarcoma viral oncogene homolog                                                                                                               | 5,5 ▲  | NM_005252                                        | 209189_at    |
|                                  | methyltransferase like 3                                                                                                                                           | 3,5 ▼  | NM_019852                                        | 209265_s_at  |
| Organismal physiological process | prostaglandin-endoperoxide synthase 2 (prostaglandin G/H synthase and cyclooxygenase)                                                                              | 13,2 ▲ | NM_000963                                        | 204748_at    |
|                                  | prostaglandin-endoperoxide synthase 2 (prostaglandin G/H synthase and cyclooxygenase)                                                                              | 9,9 ▲  | NM_000963                                        | 1554997_a_at |
|                                  | bone morphogenetic protein 2                                                                                                                                       | 6,2 ▲  | NM_001200                                        | 205289_at    |
|                                  | v-fos FBJ murine osteosarcoma viral oncogene homolog                                                                                                               | 5,5 ▲  | NM_005252                                        | 209189_at    |
|                                  | nuclear receptor subfamily 4, group A, member 2                                                                                                                    | 5,2 ▲  | NM_006186<br>NM_173171<br>NM_173172<br>NM_173173 | 204621_s_at  |
|                                  | nuclear receptor subfamily 4, group A, member 2                                                                                                                    | 5,2 ▲  | NM_006186<br>NM_173171<br>NM_173172<br>NM_173173 | 216248_s_at  |
|                                  | nuclear receptor subfamily 4, group A, member 2                                                                                                                    | 4,3 ▲  | NM_006186                                        | 204622_x_at  |
|                                  | bone morphogenetic protein 2                                                                                                                                       | 4,3 ▲  | NM_001200                                        | 205290_s_at  |
|                                  | KIT ligand                                                                                                                                                         | 3,6 ▲  | NM_000899                                        | 207029_at    |
|                                  | KIT ligand                                                                                                                                                         | 3,5 ▲  | NM_000899<br>NM_003994                           | 211124_s_at  |
|                                  | plasminogen activator, urokinase plasminogen activator, urokinase                                                                                                  | 3,4 ▲  | NM_002658                                        | 211668_s_at  |
|                                  | Transcribed locus, strongly similar to NP_005594.1 ATPase, Class I, type 8B, member 1; familial intrahepatic cholestasis 1, (progressive, Byler disease and benign | 3,4 ▲  | ---                                              | 226302_at    |

|                                                             |                                                                                                             |        |                                     |             |
|-------------------------------------------------------------|-------------------------------------------------------------------------------------------------------------|--------|-------------------------------------|-------------|
|                                                             | recurrent);<br>ATPase ,Class I,<br>type 8B, member 1;<br>benign recurrent<br>intrahepatic<br>cholestasis; p |        |                                     |             |
|                                                             | ---                                                                                                         | 3,3 ▲  | ---                                 | 229450_at   |
|                                                             | nuclear factor,<br>interleukin 3<br>regulated                                                               | 3,3 ▲  | NM_005384                           | 203574_at   |
|                                                             | KIT ligand                                                                                                  | 3,3 ▲  | NM_000899<br>NM_003994              | 226534_at   |
|                                                             | cytochrome P450,<br>family 1, subfamily<br>B, polypeptide 1                                                 | 3,2 ▲  | NM_000104                           | 202436_s_at |
|                                                             | sequestosome 1                                                                                              | 3,1 ▲  | NM_003900                           | 201471_s_at |
|                                                             | plasminogen<br>activator, urokinase                                                                         | 3,1 ▲  | NM_002658                           | 205479_s_at |
|                                                             | cytochrome P450,<br>family 1, subfamily<br>B, polypeptide 1                                                 | 3,0 ▲  | NM_000104                           | 202437_s_at |
|                                                             | neural precursor cell<br>expressed,<br>developmentally<br>down-regulated 4-<br>like                         | 3,0 ▲  | NM_015277                           | 212445_s_at |
|                                                             | C-type lectin domain<br>family 2, member B                                                                  | 3,0 ▲  | NM_005127                           | 209732_at   |
|                                                             | SET binding factor 2                                                                                        | 3,2 ▼  | NM_030962                           | 226169_at   |
|                                                             | interleukin 8                                                                                               | 3,5 ▼  | NM_000584                           | 202859_x_at |
|                                                             | smoothelin                                                                                                  | 3,6 ▼  | NM_006932<br>NM_134269<br>NM_134270 | 207390_s_at |
|                                                             | interleukin 8                                                                                               | 3,9 ▼  | NM_000584                           | 211506_s_at |
|                                                             | smoothelin                                                                                                  | 3,9 ▼  | NM_006932<br>NM_134269<br>NM_134270 | 209427_at   |
|                                                             | chemokine (C-X-C<br>motif) ligand 6<br>(granulocyte<br>chemotactic protein<br>2)                            | 3,9 ▼  | NM_002993                           | 206336_at   |
|                                                             | endothelial<br>differentiation,<br>sphingolipid G-<br>protein-coupled<br>receptor, 3                        | 4,3 ▼  | NM_005226                           | 228176_at   |
| oxidoreductas<br>e activity,<br>acting on<br>paired donors, | prostaglandin-<br>endoperoxide<br>synthase 2<br>(prostaglandin G/H                                          | 13,2 ▲ | NM_000963                           | 204748_at   |

|                                                     |                                                                                       |        |                                                        |              |
|-----------------------------------------------------|---------------------------------------------------------------------------------------|--------|--------------------------------------------------------|--------------|
| with incorporation or reduction of molecular oxygen | synthase and cyclooxygenase)                                                          |        |                                                        |              |
|                                                     | heme oxygenase (decycling) 1                                                          | 10,7 ▲ | NM_002133                                              | 203665_at    |
|                                                     | cytochrome P450, family 1, subfamily A, polypeptide 1                                 | 10,1 ▲ | NM_000499                                              | 205749_at    |
|                                                     | prostaglandin-endoperoxide synthase 2 (prostaglandin G/H synthase and cyclooxygenase) | 9,9 ▲  | NM_000963                                              | 1554997_a_at |
|                                                     | cytochrome P450, family 1, subfamily B, polypeptide 1                                 | 3,2 ▲  | NM_000104                                              | 202436_s_at  |
|                                                     | cytochrome P450, family 1, subfamily B, polypeptide 1                                 | 3,0 ▲  | NM_000104                                              | 202437_s_at  |
| Plasminogen activator activity                      | plasminogen activator, urokinase                                                      | 3,4 ▲  | NM_002658                                              | 211668_s_at  |
|                                                     | serpin peptidase inhibitor, clade B (ovalbumin), member 2                             | 3,2 ▲  | NM_002575                                              | 204614_at    |
|                                                     | plasminogen activator, urokinase                                                      | 3,1 ▲  | NM_002658                                              | 205479_s_at  |
| Protein dimerization activity                       | activating transcription factor 3                                                     | 10,8 ▲ | NM_001030287<br>NM_001040619<br>NM_001674<br>NM_004024 | 202672_s_at  |
|                                                     | v-fos FBJ murine osteosarcoma viral oncogene homolog                                  | 5,5 ▲  | NM_005252                                              | 209189_at    |
|                                                     | jun B proto-oncogene                                                                  | 4,7 ▲  | NM_002229                                              | 201473_at    |
|                                                     | Ras-related GTP binding C                                                             | 4,5 ▲  | NM_022157                                              | 222514_at    |
|                                                     | DNA-damage-inducible transcript 3                                                     | 4,3 ▲  | NM_004083                                              | 209383_at    |
|                                                     | activating transcription factor 3                                                     | 3,9 ▲  | NM_001030287<br>NM_001040619<br>NM_001674<br>NM_004024 | 1554980_a_at |
|                                                     | Ras-related GTP binding C                                                             | 3,8 ▲  | NM_022157                                              | 218088_s_at  |
|                                                     | nuclear factor, interleukin 3 regulated                                               | 3,3 ▲  | NM_005384                                              | 203574_at    |

|                                                 |                                                      |        |                                                        |              |
|-------------------------------------------------|------------------------------------------------------|--------|--------------------------------------------------------|--------------|
|                                                 |                                                      |        |                                                        |              |
| regulation of I-kappaB kinase-NF-kappaB cascade | heme oxygenase (decycling) 1                         | 10,7 ▲ | NM_002133                                              | 203665_at    |
|                                                 | polo-like kinase 2 (Drosophila)                      | 3,6 ▲  | NM_006622                                              | 201939_at    |
|                                                 | sequestosome 1                                       | 3,1 ▲  | NM_003900                                              | 201471_s_at  |
| Sequence-specific DNA binding                   | activating transcription factor 3                    | 10,8 ▲ | NM_001030287<br>NM_001040619<br>NM_001674<br>NM_004024 | 202672_s_at  |
|                                                 | v-fos FBJ murine osteosarcoma viral oncogene homolog | 5,5 ▲  | NM_005252                                              | 209189_at    |
|                                                 | nuclear receptor subfamily 4, group A, member 2      | 5,2 ▲  | NM_006186<br>NM_173171<br>NM_173172<br>NM_173173       | 204621_s_at  |
|                                                 | nuclear receptor subfamily 4, group A, member 2      | 5,2 ▲  | NM_006186<br>NM_173171<br>NM_173172<br>NM_173173       | 216248_s_at  |
|                                                 | jun B proto-oncogene                                 | 4,7 ▲  | NM_002229                                              | 201473_at    |
|                                                 | nuclear receptor subfamily 4, group A, member 2      | 4,3 ▲  | NM_006186<br>NM_173171<br>NM_173172<br>NM_173173       | 204622_x_at  |
|                                                 | DNA-damage-inducible transcript 3                    | 4,3 ▲  | NM_004083                                              | 209383_at    |
|                                                 | activating transcription factor 3                    | 3,9 ▲  | NM_001030287<br>NM_001040619<br>NM_001674<br>NM_004024 | 1554980_a_at |
|                                                 | nuclear receptor subfamily 4, group A, member 1      | 3,5 ▲  | NM_002135<br>NM_173157<br>NM_173158                    | 202340_x_at  |
|                                                 | nuclear factor, interleukin 3 regulated              | 3,3 ▲  | NM_005384                                              | 203574_at    |
|                                                 | Nuclear receptor subfamily 2, group F, member 1      | 4,5 ▼  | NM_005654                                              | 209505_at    |
| Transcription regulator activity                | Kruppel-like factor 4 (gut)                          | 14,3 ▲ | NM_004235                                              | 221841_s_at  |
|                                                 | activating transcription factor 3                    | 10,8 ▲ | NM_001030287<br>NM_001040619<br>NM_001674              | 202672_s_at  |

|  |                                                                        |       |                                                        |              |
|--|------------------------------------------------------------------------|-------|--------------------------------------------------------|--------------|
|  |                                                                        |       | NM_004024                                              |              |
|  | v-fos FBJ murine osteosarcoma viral oncogene homolog                   | 5,5 ▲ | NM_005252                                              | 209189_at    |
|  | hairy and enhancer of split 1, (Drosophila)                            | 5,5 ▲ | NM_005524                                              | 203394_s_at  |
|  | nuclear receptor subfamily 4, group A, member 2                        | 5,2 ▲ | NM_006186<br>NM_173171<br>NM_173172<br>NM_173173       | 204621_s_at  |
|  | nuclear receptor subfamily 4, group A, member 2                        | 5,2 ▲ | NM_006186<br>NM_173171<br>NM_173172<br>NM_173173       | 216248_s_at  |
|  | jun B proto-oncogene                                                   | 4,7 ▲ | NM_002229                                              | 201473_at    |
|  | hairy and enhancer of split 1, (Drosophila)                            | 4,6 ▲ | NM_005524                                              | 203395_s_at  |
|  | nuclear receptor subfamily 4, group A, member 2                        | 4,3 ▲ | NM_006186<br>NM_173171<br>NM_173172<br>NM_173173       | 204622_x_at  |
|  | DNA-damage-inducible transcript 3                                      | 4,3 ▲ | NM_004083                                              | 209383_at    |
|  | inhibitor of DNA binding 2, dominant negative helix-loop-helix protein | 4,2 ▲ | NM_002166                                              | 201565_s_at  |
|  | activating transcription factor 3                                      | 3,9 ▲ | NM_001030287<br>NM_001040619<br>NM_001674<br>NM_004024 | 1554980_a_at |
|  | AT rich interactive domain 5B (MRF1-like)                              | 3,6 ▲ | NM_032199                                              | 212614_at    |
|  | nuclear receptor subfamily 4, group A, member 1                        | 3,6 ▲ | NM_002135<br>NM_173157<br>NM_173158                    | 202340_x_at  |
|  | Kruppel-like factor 4 (gut)                                            | 3,4 ▲ | NM_004235                                              | 220266_s_at  |
|  | nuclear factor, interleukin 3 regulated                                | 3,3 ▲ | NM_005384                                              | 203574_at    |
|  | Kruppel-like factor 2 (lung)                                           | 3,2 ▲ | NM_016270                                              | 219371_s_at  |
|  | inhibitor of DNA binding 2, dominant negative helix-loop-              | 3,1 ▲ | NM_001039082<br>NM_002166                              | 201566_x_at  |

|                    |                                                                                           |        |                        |             |
|--------------------|-------------------------------------------------------------------------------------------|--------|------------------------|-------------|
|                    | helix protein /// inhibitor of DNA binding 2B, dominant negative helix-loop-helix protein |        |                        |             |
|                    | Nuclear receptor subfamily 2, group F, member 1                                           | 4,5 ▼  | NM_005654              | 209505_at   |
| Vesicular fraction | heme oxygenase (decycling) 1                                                              | 10,7 ▲ | NM_002133              | 203665_at   |
|                    | cytochrome P450, family 1, subfamily A, polypeptide 1                                     | 10,1 ▲ | NM_000499              | 205749_at   |
|                    | cytochrome P450, family 1, subfamily B, polypeptide 1                                     | 3,2 ▲  | NM_000104              | 202436_s_at |
|                    | cytochrome P450, family 1, subfamily B, polypeptide 1                                     | 3,0 ▲  | NM_000104              | 202437_s_at |
|                    | dehydrogenase/reductase (SDR family) member 9                                             | 3,2 ▼  | NM_005771<br>NM_199204 | 223952_x_at |
|                    | dehydrogenase/reductase (SDR family) member 9                                             | 3,5 ▼  | NM_005771<br>NM_199204 | 224009_x_at |
|                    | dehydrogenase/reductase (SDR family) member 9                                             | 3,6 ▼  | NM_005771<br>NM_199204 | 219799_s_at |

### Functional categories according to Gene Ontology

Relatively enriched categories ( $p < 0.01$ ). Genes, regulated after infection with the septicemic GBS strain ATCC®13813 were listed according to Gene Ontology ([www.bioinfo.vanderbilt.edu/gotm](http://www.bioinfo.vanderbilt.edu/gotm)) regarding function, process and cell localisation, based on a more than 3-fold difference compared to unstimulated HCAEC.
